# Supplementary material for: Photo-induced guest–host interactions produce chiral conglomerates accompanying grain boundaries in a smectic phase
Source: Royal Society of Chemistry journal article supplement (doi:10.1039/d1tc01628h), 2021-01-01
Supplement: d1tc01628h1.pdf [file d1tc01628h1.pdf]

## Electronic supplementary information

### Photo-induced guest-host interactions produce chiral conglomerates in a smectic phase

Hideaki Sasaki, Koudai Abe, Masanobu Sagisaka and Atsushi Yoshizawa\*

*Department of Frontier Materials Chemistry, Graduate School of Science and Technology, Hirosaki University, 3 Bunkyo-cho, Hirosaki, Aomori 036-8561, Japan*  
*E-mail: [ayoshiza@hirosaki-u.ac.jp](mailto:ayoshiza@hirosaki-u.ac.jp)*

1. Characterization of trimers **I-7**, **I-8**, **I-9** and **I-10**.
2. **Table S1**. Phase transition temperatures of mixtures containing trimer **I-*n*** (20 wt%) and compound **II** (80 wt%) on a glass slide with a cover glass with 365 nm UV irradiation at a power of 20 mW cm<sup>-2</sup>. The cooling rate was 5 °C min<sup>-1</sup>.
3. **Fig. S1** (a) Optical texture of trimer **I-8** in the N phase at  $T-T_{\text{Iso-N}} = -0.5$  K and (b) that under 365 nm UV irradiation at 10 mW cm<sup>-2</sup>. The sample was confined in a 5 μm homogeneously aligned cell. These textures were observed between crossed polarizers.
4. **Fig. S2** (a) Optical texture of trimer **I-8** in the Cry phase at  $T-T_{\text{N-Cry}} = -0.5$  K and (b) that under 365 nm UV irradiation at 20 mW cm<sup>-2</sup>. The sample was confined in a 5 μm homogeneously aligned cell. These textures were observed between crossed polarizers.
5. **Fig. S3** (a) Optical texture of a mixture of trimer **I-11** (20 wt%) and compound **II** (80 wt%) in the coexistence of the N and X phases at 81.2 °C, (b) that of the mixture with 365nm UV irradiation at 20 mW cm<sup>-2</sup> at 81.2 °C, (c) that of the mixture at 4 minutes after turning off the UV light. The sample was confined in a 5 μm homogeneously aligned cell. These textures were observed between crossed polarizers.
6. **Fig. S4** (a) Optical texture of a mixture of trimer **I-11** (20 wt%) and compound **II** (80 wt%) in the coexistence of the SmC and X phases at 74.8 °C, (b) that of the mixture

with 365nm UV irradiation at 20 mW cm<sup>-2</sup> and (c) that of the mixture at 4 minutes after turning off the UV light. The sample was confined in a 5 μm homogeneously aligned cell. The textures were observed between crossed polarizers. White bars indicate 500 μm.

7. **Fig. S5** Optical textures of the photo-induced phase of trimer **I-11** (20 wt%) and compound **II** (80 wt%) at 48.2 °C. The sample confined in a 5 μm homogeneously aligned cell was cooled from the isotropic liquid with 365 nm UV irradiation at a power of 20 mW cm<sup>-2</sup>. R indicates the rubbing direction.
8. **Fig. S6** Optical texture of a mixture of trimer **I-11** (20 wt%) and compound **II** (80 wt%) cooling from the isotropic liquid with 365 UV irradiation at a power of 20 mW cm<sup>-2</sup> between crossed polarizers at 51.4 °C. The sample was on a glass plate with a cover glass. The crystalline phase can be seen in the upper left of the texture.
9. **Fig. S7** Optical textures of a mixture of trimer **I-11** (20 wt%) and compound **II** (80 wt%) in the Cry at 33.5°C between crossed polarizers.
10. **Fig. S8** Optical textures of a mixture of trimer **I-7** (20 wt%) and compound **II** (80 wt%) in the SmC phase cooling from the isotropic liquid with 365 UV irradiation at a power of 20 mW cm<sup>-2</sup> between crossed and decrossed polarizers at 74.5 °C. The sample was on a glass plate with a cover glass.
11. **Fig. S9** Optical textures of a mixture of trimer **I-8** (20 wt%) and compound **II** (80 wt%) in the SmC phase cooling from the isotropic liquid with 365 UV irradiation at a power of 20 mW cm<sup>-2</sup> between crossed and decrossed polarizers at 64.4 °C. The sample was on a glass plate with a cover glass.
12. **Fig. S10** MOPAC models for *cis*-isomers of trimers **I-8** and **I-9**.

Characterization of trimers **I-7**, **I-8**, **I-9** and **I-10**.

**4, 4'-Bis{11-[4-(5-hexylpyrimidin-2-yl)phenoxy]heptyloxy}azobenzene (I-7)**

<sup>1</sup>HNMR (500 MHz, CDCl<sub>3</sub>, TMS) : δ = 8.56 (s, 4H, Ar-H), 8.34 (d, 4H, Ar-H, *J*=8.5 Hz), 7.85 (d, 4H, Ar-H, *J*=9.1 Hz), 6.98 (d, 8H, Ar-H, *J*=8.0 Hz), 4.04 (t, 8H, -O-CH<sub>2</sub>-, *J*=6.6 Hz), 2.59 (t, 4H, Ar-CH<sub>2</sub>, *J*=7.7 Hz), 1.84 (quint, 8H, aliphatic-H, *J*=6.9 Hz), 1.64 (quint, 4H, aliphatic-H, *J*=7.4 Hz), 1.55-1.30 (m, 24H, aliphatic-H), 0.89 (t, 6H, -CH<sub>3</sub>, *J*=6.9 Hz)

IR (KBr): ν cm<sup>-1</sup>: 2937, 2853 (C-Hstr), 1603, 1581, 1428 (C=Cstr, C=Nstr), 1252 (C-Ostr)

Elemental analysis (%): Calc. for C<sub>58</sub>H<sub>74</sub>N<sub>6</sub>O<sub>4</sub>: C, 75.78; H, 8.11; N, 9.14. Found C, 76.20; H, 8.22; N, 9.36.

**4, 4'-Bis{11-[4-(5-hexylpyrimidin-2-yl)phenoxy]octyloxy}azobenzene (I-8)**

<sup>1</sup>HNMR (500 MHz, CDCl<sub>3</sub>, TMS) : δ = 8.56 (s, 4H, Ar-H), 8.33 (d, 4H, Ar-H, *J*=8.6 Hz), 7.85 (d, 4H, Ar-H, *J*=9.1 Hz), 6.98 (d, 8H, Ar-H, *J*=8.0 Hz), 4.03 (t, 8H, -O-CH<sub>2</sub>-, *J*=6.6 Hz), 2.59 (t, 4H, Ar-CH<sub>2</sub>, *J*=7.4 Hz), 1.82 (quint, 8H, aliphatic-H, *J*=7.0 Hz), 1.63 (quint, 4H, aliphatic-H, *J*=7.4 Hz), 1.50-1.28 (m, 28H, aliphatic-H), 0.89 (t, 6H, -CH<sub>3</sub>, *J*=6.9 Hz)

IR (KBr): ν cm<sup>-1</sup>: 2938, 2852 (C-Hstr), 1605, 1580, 1429 (C=Cstr, C=Nstr), 1245 (C-Ostr)

Elemental analysis (%): Calc. for C<sub>60</sub>H<sub>78</sub>N<sub>6</sub>O<sub>4</sub>: C, 76.07; H, 8.30; N, 8.87. Found C, 76.23; H, 8.18; N, 8.93.

**4, 4'-Bis{11-[4-(5-hexylpyrimidin-2-yl)phenoxy]nonyloxy}azobenzene (I-9)**

<sup>1</sup>HNMR (500 MHz, CDCl<sub>3</sub>, TMS) : δ = 8.56 (s, 4H, Ar-H), 8.33 (d, 4H, Ar-H, *J*=9.1 Hz), 7.85 (d, 4H, Ar-H, *J*=9.1 Hz), 6.97 (d, 8H, Ar-H, *J*=9.2 Hz), 4.03 (t, 8H, -O-CH<sub>2</sub>-, *J*=6.6 Hz), 2.59 (t, 4H, Ar-CH<sub>2</sub>, *J*=7.4 Hz), 1.82 (quint, 8H, aliphatic-H, *J*=7.0 Hz), 1.63 (quint, 4H, aliphatic-H, *J*=7.4 Hz), 1.48-1.29 (m, 32H, aliphatic-H), 0.89 (t, 6H, -CH<sub>3</sub>, *J*=6.9 Hz)

IR (KBr): ν cm<sup>-1</sup>: 2937, 2850 (C-Hstr), 1603, 1582, 1429 (C=Cstr, C=Nstr), 1250 (C-Ostr)

Elemental analysis (%): Calc. for C<sub>62</sub>H<sub>82</sub>N<sub>6</sub>O<sub>4</sub>: C, 76.35; H, 8.47; N, 8.62. Found C, 76.90; H, 8.68; N, 8.81.

**4, 4'-Bis{11-[4-(5-hexylpyrimidin-2-yl)phenoxy]decyloxy}azobenzene (I-10)**

<sup>1</sup>HNMR (500 MHz, CDCl<sub>3</sub>, TMS) : δ = 8.56 (s, 4H, Ar-H), 8.33 (d, 4H, Ar-H, *J*=8.6 Hz), 7.85 (d, 4H, Ar-H, *J*=9.1 Hz), 6.98 (d, 8H, Ar-H, *J*=8.6 Hz), 4.02 (t, 8H, -O-CH<sub>2</sub>-, *J*=6.3 Hz), 2.59 (t, 4H, Ar-CH<sub>2</sub>, *J*=7.7 Hz), 1.81 (quint, 8H, aliphatic-H, *J*=6.9 Hz), 1.64 (quint, 4H, aliphatic-H, *J*=7.3 Hz), 1.48-1.31 (m, 38H, aliphatic-H), 0.89 (t, 6H, -CH<sub>3</sub>, *J*=6.9 Hz)

IR (KBr): ν cm<sup>-1</sup>: 2920, 2850 (C-Hstr), 1604, 1582, 1430 (C=Cstr, C=Nstr), 1245 (C-Ostr)

Elemental analysis (%): Calc. for  $C_{64}H_{86}N_6O_4$ : C, 76.61; H, 8.64; N, 8.38. Found C, 76.56; H, 8.36; N, 8.39.

**Table S1.** Phase transition temperatures of mixtures containing trimer **I-*n*** (20 wt%) and compound **II** (80 wt%) on a glass slide with a cover glass with 365 nm UV irradiation at a power of 20 mW cm<sup>-2</sup>. The cooling rate was 5 °C min<sup>-1</sup>.

| Trimer      | Phase transition temperatures (°C)               |
|-------------|--------------------------------------------------|
| <b>I-7</b>  | Iso 165.1 N 87.9 N + SmC 66.7 SmC 44.1 Cry       |
| <b>I-8</b>  | Iso 174.0 N 76.2 N + SmC 68.5 SmC 43.1 Cry       |
| <b>I-9</b>  | Iso 164.8 N 66.2 N + SmC 55.2 SmC + Cry 45.6 Cry |
| <b>I-10</b> | Iso 166.8 N 80.0 N + SmC 72.2 SmC 42.7 Cry       |
| <b>I-11</b> | Iso 162.8 N 77.9 N + SmC 55.1 SmC + Cry 42.2 Cry |

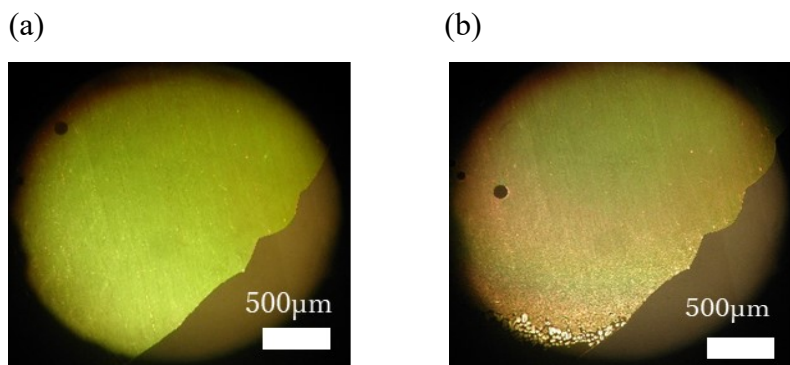

**Fig. S1** (a) Optical texture of trimer **I-8** in the N phase at  $T-T_{\text{Iso-N}} = -0.5$  K and (b) that under 365 nm UV irradiation at  $10 \text{ mW cm}^{-2}$ . The sample was confined in a  $5 \mu\text{m}$  homogeneously aligned cell. These textures were observed between crossed polarizers.

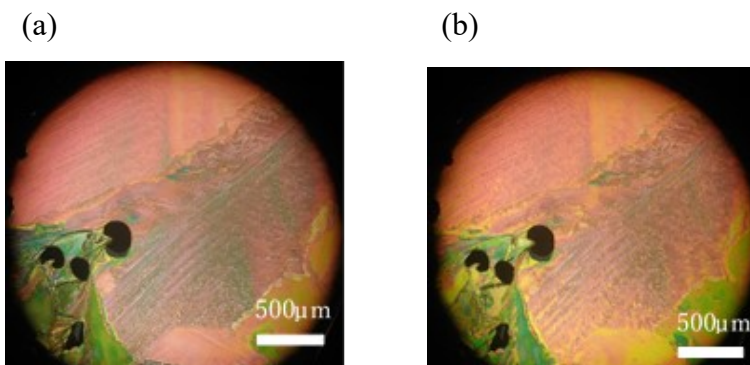

**Fig. S2** (a) Optical texture of trimer **I-8** in the Cry phase at  $T - T_{N-Cry} = -0.5$  K and (b) that under 365 nm UV irradiation at  $20 \text{ mW cm}^{-2}$ . The sample was confined in a  $5 \mu\text{m}$  homogeneously aligned cell. These textures were observed between crossed polarizers.

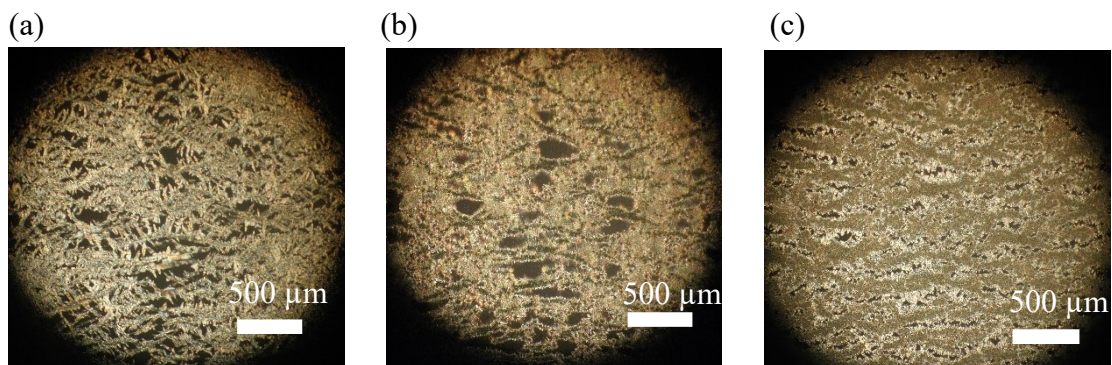

**Fig. S3** (a) Optical texture of a mixture of trimer **I-11** (20 wt%) and compound **II** (80 wt%) in the coexistence of the N and X phases at 81.2 °C, (b) that of the mixture with 365nm UV irradiation at 20 mW cm<sup>-2</sup> at 81.2 °C, (c) that of the mixture at 4 minutes after turning off the UV light. The sample was confined in a 5 μm homogeneously aligned cell. These textures were observed between crossed polarizers.



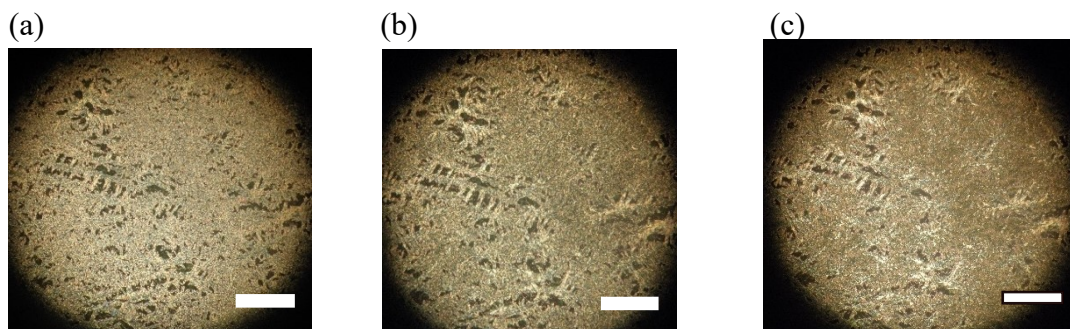

**Fig. S4** (a) Optical texture of a mixture of trimer **I-11** (20 wt%) and compound **II** (80 wt%) in the coexistence of the SmC and X phases at 74.8 °C, (b) that of the mixture with 365nm UV irradiation at 20 mW cm<sup>-2</sup> and (c) that of the mixture at 4 minutes after turning off the UV light. The sample was confined in a 5 μm homogeneously aligned cell. These textures were observed between crossed polarizers. White bars indicate 500 μm.

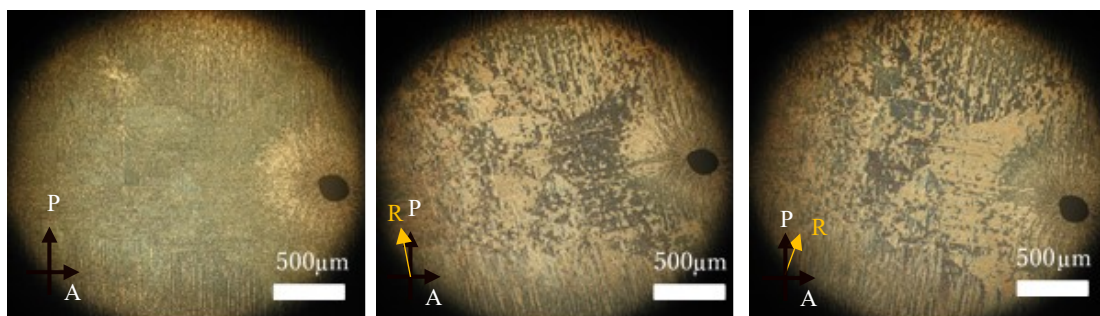

**Fig. S5** Optical textures of the photo-induced phase of trimer **I-11** (20 wt%) and compound **II** (80 wt%) at 48.2 °C. The sample confined in a 5  $\mu\text{m}$  homogeneously aligned cell was cooled from the isotropic liquid with 365 nm UV irradiation at a power of 20  $\text{mW cm}^{-2}$ . R indicates the rubbing direction.

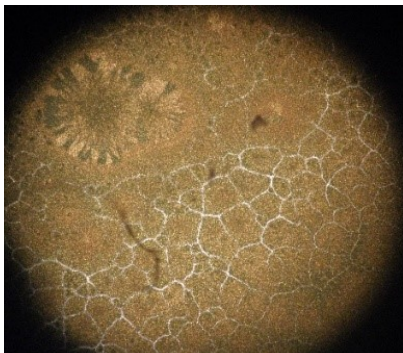

**Fig. S6** Optical texture of a mixture of trimer **I-11** (20 wt%) and compound **II** (80 wt%) cooling from the isotropic liquid with 365 UV irradiation at a power of  $20 \text{ mW cm}^{-2}$  between crossed polarizers at  $51.4 \text{ }^\circ\text{C}$ . The sample was on a glass plate with a cover glass. The crystalline phase can be seen in the upper left of the texture.

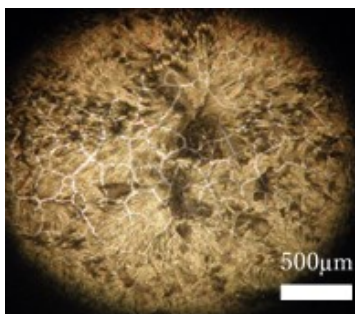

**Fig. S7** Optical textures of a mixture of trimer **I-11** (20 wt%) and compound **II** (80 wt%) in the Cry at 33.5°C between crossed polarizers.

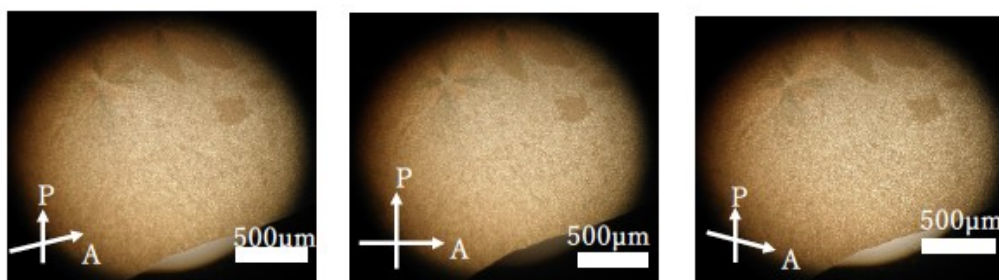

**Fig. S8** Optical textures of a mixture of trimer **I-7** (20 wt%) and compound **II** (80 wt%) in the SmC phase cooling from the isotropic liquid with 365 UV irradiation at a power of  $20 \text{ mW cm}^{-2}$  between crossed and decrossed polarizers at  $74.5 \text{ }^\circ\text{C}$ . The sample was on a glass plate with a cover glass.

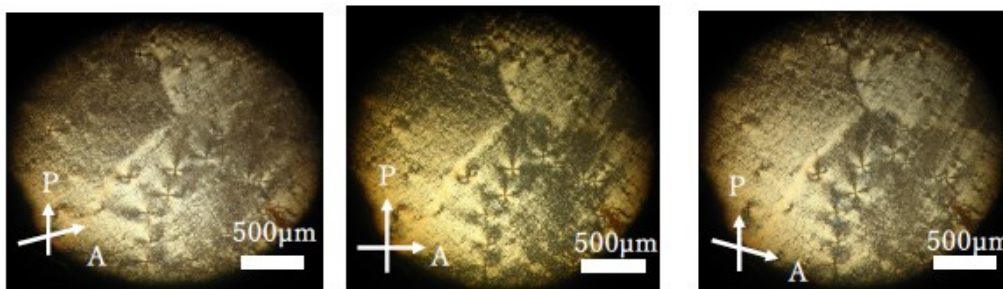

**Fig. S9** Optical textures of a mixture of trimer **I-8** (20 wt%) and compound **II** (80 wt%) in the SmC phase cooling from the isotropic liquid with 365 UV irradiation at a power of  $20 \text{ mW cm}^{-2}$  between crossed and decrossed polarizers at  $64.4 \text{ }^\circ\text{C}$ . The sample was on a glass plate with a cover glass.

(a) **I-8**

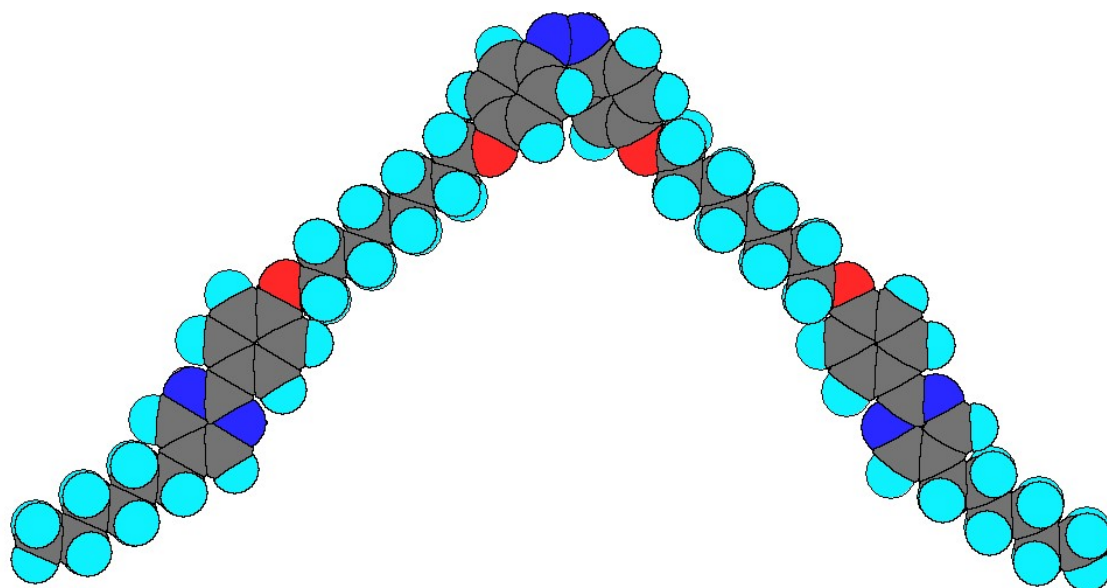

(b) **I-9**

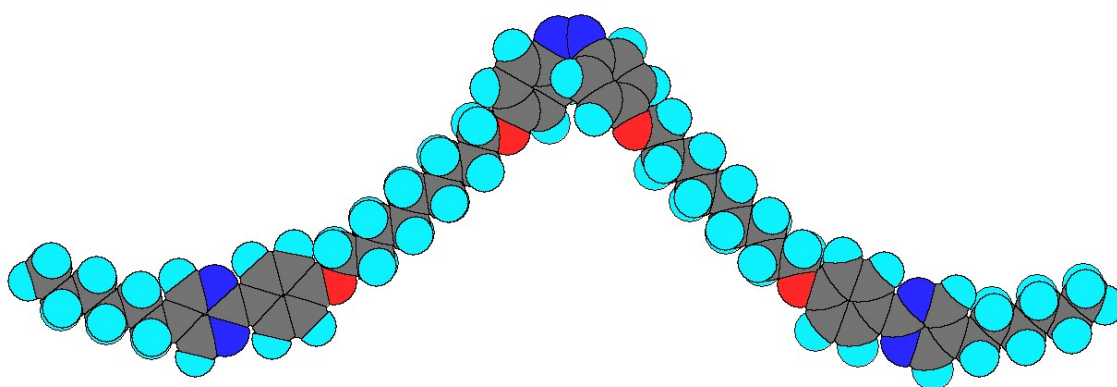

**Fig. S10** MOPAC models for *cis*-isomers of trimers **I-8** and **I-9**.
